# Supplementary material for: Loss of the major Type I arginine methyltransferase PRMT1 causes substrate scavenging by other PRMTs
Source: PubMed Central journal article supplement — Sci Rep. 2013 Feb 19;3:1311. doi: 10.1038/srep01311 (PMC3575585; doi:10.1038/srep01311), 2013-02-19
Supplement: srep01311-s1.pdf [file srep01311-s1.pdf]

# Loss of the major Type I arginine methyltransferase PRMT1 causes substrate scavenging by other PRMTs

Surbhi Dhar<sup>1^</sup>, Vidyasiri Vemulapalli<sup>1^</sup>, Alexander N. Patananan<sup>2</sup>, Grace Huang<sup>2</sup>, Alessandra Di Lorenzo<sup>1</sup>, Stephane Richard<sup>4</sup>, Michael J. Comb<sup>3</sup>, Ailan Guo<sup>3</sup>, Steven G. Clarke<sup>2</sup>, Mark T. Bedford<sup>1\*</sup>

<sup>1</sup>Department of Molecular Carcinogenesis, The University of Texas MD Anderson Cancer Center, Smithville, TX 78957, USA.

<sup>2</sup>Department of Chemistry and Biochemistry, University of California Los Angeles, Los Angeles, CA 90095, USA.

<sup>3</sup>Cell Signaling Technology Inc., Danvers, MA 01923, USA.

<sup>4</sup>Terry Fox Molecular Oncology Group and the Bloomfield Center for Research on Aging, Lady Davis Institute for Medical Research, Sir Mortimer B. Davis Jewish General Hospital, and Departments of Medicine and Oncology, McGill University, Montréal, Québec, Canada

\*Correspondence should be addressed to M.T.B. (mtbedford@mdanderson.org)

<sup>^</sup>Equal contribution

## SUPPLEMENTAL INFORMATION

Supplemental Figure 1 – Expression analysis of PRMTs in the absence of PRMT1

Supplemental Figure 2 – Co-immunoprecipitation of GFP-PRMTs with endogenous PRMT1

Supplemental Figure 3 – Hyper-monomethylation of SmB/SmB' upon PRMT5 loss

Supplemental Figure 4 – Workflow for the two-dimensional quantification of arginine methylation

Supplemental Figure 5 – Reverse-phase HPLC methods optimized to quantify OPA-derivatives

Supplemental Table 1 – Comparison of the relative levels of MMA, ADMA, and SDMA

Supplemental Table 2 – Antibodies used in this study

**Figure S1. Expression analysis of PRMTs in the absence of PRMT1.** PRMT1<sup>fl/-</sup> ER-Cre MEFs were untreated or treated with 4-hydroxytamoxifen (OHT) for 4 and 8 days. Whole cell extracts were prepared and subjected to Western analysis with  $\alpha$ PRMT1,  $\alpha$ PRMT3,  $\alpha$ PRMT4,  $\alpha$ PRMT5,  $\alpha$ PRMT6,  $\alpha$ PRMT7 and MMA1 antibodies. The  $\beta$ -actin control is shown for equal loading.

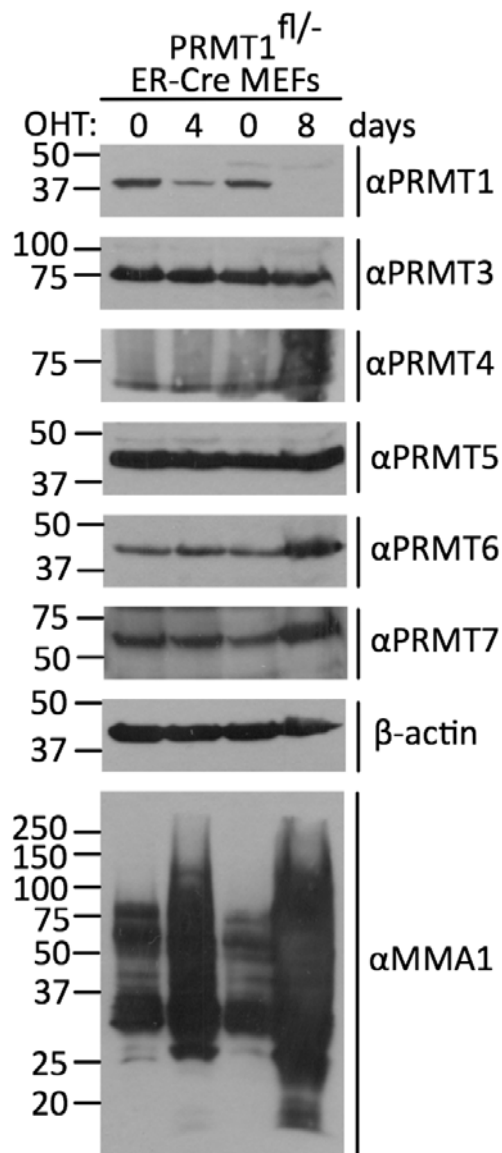

**Figure S2. Co-immunoprecipitation of GFP-PRMTs with endogenous PRMT1.** HEK293 cells transiently expressing GFP or GFP-PRMT [1-9] fusion proteins were immunoprecipitated with anti-GFP or anti-IgG antibodies and subjected to Western analysis with  $\alpha$ PRMT1 (a) or  $\alpha$ GFP (b) antibodies. PRMT1 co-immunoprecipitates with itself and with PRMT8 (indicated with solid white dots). (c) Western analysis of the input samples using  $\alpha$ GFP antibody shows the expression of GFP-PRMT [1-9] fusion proteins, which are marked with solid white dots.

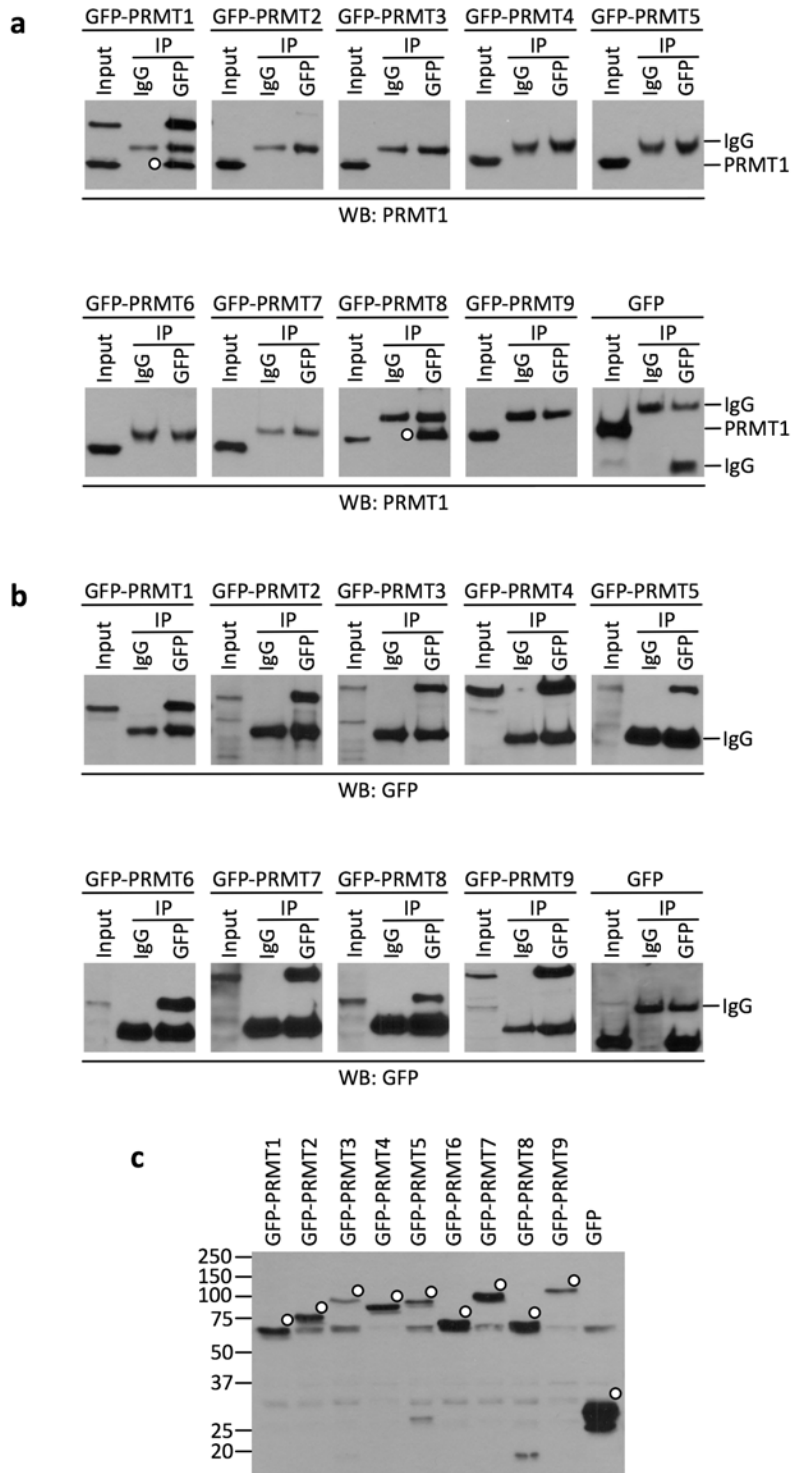

**Figure S3. Hyper-monomethylation of SmB/SmB' upon PRMT5 loss.** PRMT5 control and knockdown HeLa cells were immunoprecipitated (IP) with Y12 antibody and subjected to Western analysis with monomethylarginine (MMA5) antibody.

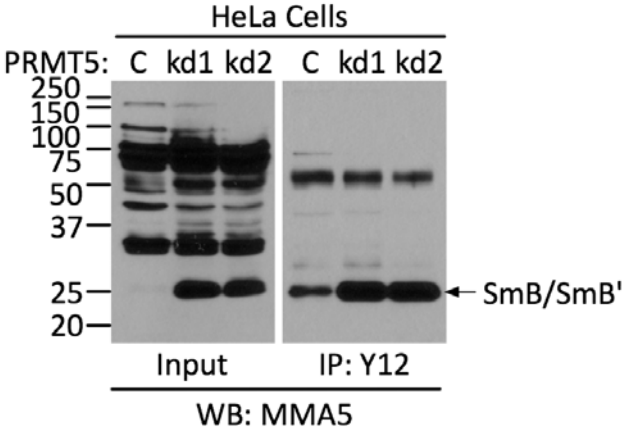

**Figure S4. Workflow for the two-dimensional quantification of MMA, ADMA, SDMA, and arginine in MEFs.**

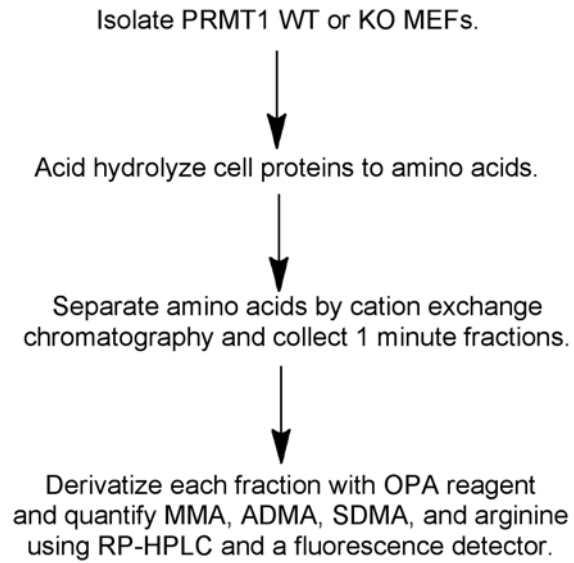

**Figure S5. Reverse-phase HPLC methods optimized to quantify OPA-derivatives of arginine (R), MMA, ADMA, and SDMA.**

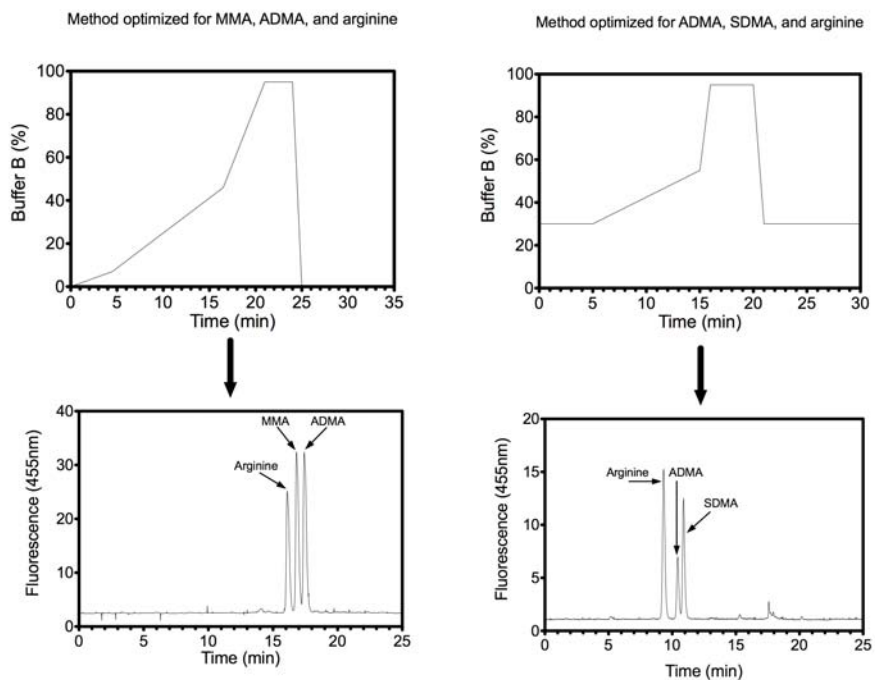

**Table S1. Comparison of the relative levels of MMA, ADMA, and SDMA in different mammalian cells.** Values from rat brain and liver were taken from Matsuoka (1972)<sup>1</sup> as translated by Paik and Kim (1980)<sup>2</sup>, and converted from  $\mu\text{mol per g protein}$  assuming an average arginine residue content of 5% in proteins.

| Cells                      | MMA                                                   | ADMA | SDMA | Reference  |
|----------------------------|-------------------------------------------------------|------|------|------------|
|                            | Average number of residues per 1000 arginine residues |      |      |            |
| Wild-type MEFs             | 0.12                                                  | 4.01 | 0.34 | This study |
| PRMT1 KO MEFs              | 0.57                                                  | 2.13 | 0.94 | This study |
| Rat brain                  | 2.04                                                  | 3.60 | 0.99 | 1, 2       |
| Rat liver                  | 0.65                                                  | 2.95 | 0.35 | 1, 2       |
| Rat brain nuclear fraction | 1.98                                                  | 10.1 | 1.10 | 1, 2       |

1. Matsuoka, M. [Epsilon-N-methylated lysine and guanidine-N-methylated arginine of proteins. 3. Presence and distribution in nature and mammals]. *Seikagaku* **44**, 364-70 (1972).
2. Paik, W.K. & Kim, S. Natural occurrence of various methylated amino acid derivatives. (ed. Meister, A.) (John Wiley & sons, New York, 1980).

**Table S2. Antibodies used in this study.** The monomethylarginine (MMA1-5), asymmetric dimethylarginine (ADMA) and symmetric dimethylarginine (SDMA) antibodies tested in this study were generated by Cell Signaling Technology®.

| Antibody Name | Company                      | Antibody # | Catalog #                     | Antibody type | Host Species | WB Dilution | Results Location                                   |
|---------------|------------------------------|------------|-------------------------------|---------------|--------------|-------------|----------------------------------------------------|
| MMA1          | Cell Signaling               | D5A12A3    | 8711                          | Monoclonal    | Rabbit       | 1:2000      | Figure 1A-E                                        |
| MMA2          | Cell Signaling               | D3C4A6     | 8015                          | Monoclonal    | Rabbit       | 1:1000      | Figure 1A-E<br>Figure 2A<br>Figure S1              |
| MMA3          | Cell Signaling               | D2F4E5     |                               | Monoclonal    | Rabbit       | 1:1000      | Figure 1A-E                                        |
| MMA4          | Cell Signaling               | D1C6D1     |                               | Monoclonal    | Rabbit       | 1:1000      | Figure 1A-E                                        |
| MMA5          | Cell Signaling               | D7B7F1     |                               | Monoclonal    | Rabbit       | 1:1000      | Figure 1A-E<br>Figure S3                           |
| ADMA          | Cell Signaling               | BL8241     | Not yet commercially released | Polyclonal    | Rabbit       | 1:500       | Figure 1A-E<br>Figure 2B                           |
| SDMA          | Cell Signaling               | BL8243     | Not yet commercially released | Polyclonal    | Rabbit       | 1:1000      | Figure 1A-E<br>Figure 2C                           |
| H3R17me2a     | Millipore                    | N/A        | 07-214                        | Polyclonal    | Rabbit       | 1:1000      | Figure 1A-E                                        |
| Y12           | A gift from Robin Reed       | N/A        | N/A                           | Monoclonal    | Mouse        | 1:100       | Figure S3                                          |
| PRMT1         | A gift from Stephane Richard | N/A        | N/A                           | Polyclonal    | Rabbit       | 1:1000      | Figure 1A<br>Figure 2<br>Figure S1<br>Figure S2A-B |
| PRMT3         | N/A                          | N/A        | N/A                           | Polyclonal    | Rabbit       | 1:500       | Figure 1B<br>Figure S1                             |
| CARM1         | Bethyl                       | N/A        | A300-421A                     | Polyclonal    | Rabbit       | 1:2000      | Figure 1C<br>Figure S1                             |
| PRMT5         | Active Motif                 | N/A        | 61001                         | Polyclonal    | Rabbit       | 1:2000      | Figure 1D<br>Figure S1                             |
| PRMT6         | Bethyl                       | N/A        | A300-929A                     | Polyclonal    | Rabbit       | 1:1000      | Figure 1E<br>Figure S1                             |
| PRMT7         | A gift from Said Sif         | N/A        | N/A                           | Polyclonal    | Rabbit       | 1:500       | Figure S1                                          |
